# Supplementary material
Source: ML conference proceedings conference paper supplement (https://proceedings.neurips.cc/paper_files/paper/2023/hash/5e0da5da69b71349ae0bd7ad716e4bc9-Abstract.html)
Supplement: Supplementary file 1 [file 5e0da5da69b71349ae0bd7ad716e4bc9-Supplemental-Conference.pdf]

## 1 A More Examples of the Semantic Inconsistency Problem

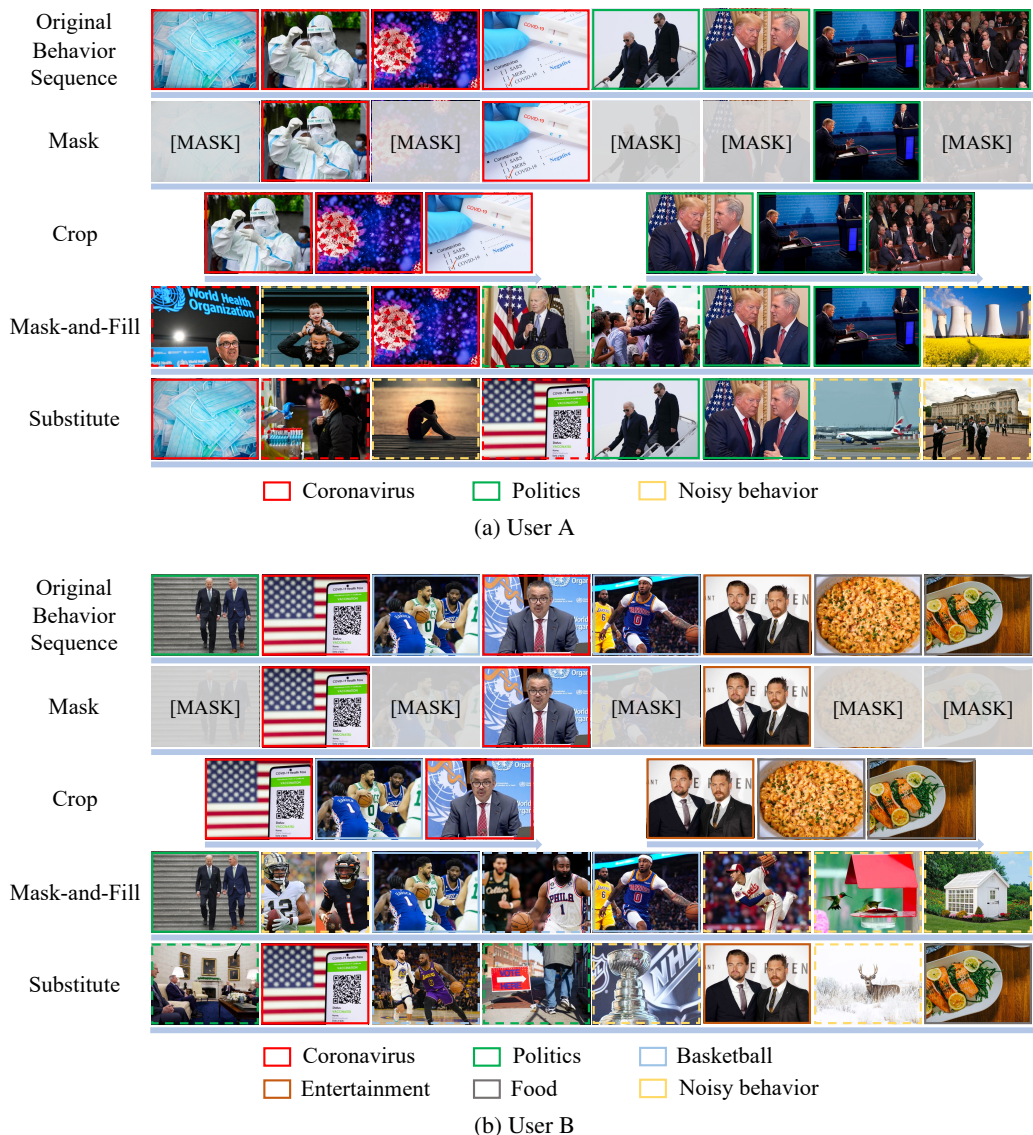

Figure 1: Illustrations of the impact of diverse data augmentation methods on different user behavior sequences. Each picture represents a news article clicked by the user. Pictures with the same color border reflect similar interests. Dash borders indicate behaviors replaced by the augmentation method.

2 We randomly sample two more anonymous users from the online news platform to illustrate the  
 3 impact of various data augmentation methods on different user behavior sequences and the consequent  
 4 semantic inconsistency problem. The users' recent eight behaviors and the results of several data  
 5 augmentation methods are shown in Fig. 1. The data augmentation proportion is set as 0.6. From the  
 6 original behavior sequence of user A, we may infer that the user is quite concerned about coronavirus  
 7 and politics. We also find that the behavior sequence augmented by masking well preserves the user's  
 8 interests. However, the two sequences augmented by cropping contain completely different interests  
 9 of the user over time. Meanwhile, some behaviors replaced by mask-and-fill and substitute are noisy,  
 10 which the user may not be interested in. Similarly, the original behavior sequence of user B shows  
 11 the user's potential interests in coronavirus, politics, basketball, entertainment, and food. As a result,  
 12 augmentation methods such as mask and crop are likely to lose certain interests of the user, while  
 13 augmentation methods such as mask-and-fill and substitute tend to bring in noisy behaviors. In fact,  
 14 it is hard to determine what are the real interests of user B from such a diverse behavior sequence

15 since some behaviors may be the result of misclicking or click-baiting, thus making it even harder to  
 16 provide a semantically consistent augmentation. From these examples, we can find that existing data  
 17 augmentation methods may fail to preserve the characteristics or interests in the behavior sequence  
 18 and cannot guarantee semantic consistency between the augmented views. Thus, directly forcing the  
 19 user model to maximize the agreement between the augmented sequences may result in a negative  
 20 transfer for downstream tasks.

## 21 B The Algorithm of AdaptSSR

22 The pseudo-codes of the pre-training procedure with our AdaptSSR are shown in Algorithm 1.

---

### Algorithm 1 Pre-training Procedure with AdaptSSR

---

**Input:** A corpus of user behavior sequences  $\mathcal{S}$  and a set of data augmentation operators  $\mathcal{A}$ .

**Output:** The pre-trained user model  $\mathcal{M}$ .

- 1: Randomly initialize the parameter of the user model  $\mathcal{M}$ .
- 2: **while** not converged **do**
- 3:   Randomly sample a batch of user behavior sequences  $\{S_i\}_{i=1}^B$  from  $\mathcal{S}$ .
- 4:   **for each**  $S_i$  **do**
- 5:     Randomly select two augmentation operators  $f$  and  $g$  from  $\mathcal{A}$ .
- 6:      $\hat{\mathbf{u}}_i, \hat{\mathbf{u}}_i^+ \leftarrow \mathcal{M}(f(S_i)), \mathcal{M}(f(S_i))$ .     ▷ With independently sampled dropout masks.
- 7:      $\tilde{\mathbf{u}}_i, \tilde{\mathbf{u}}_i^+ \leftarrow \mathcal{M}(g(S_i)), \mathcal{M}(g(S_i))$ .     ▷ With independently sampled dropout masks.
- 8:      $\mathbf{U}_i^- \leftarrow \{\hat{\mathbf{u}}_j, \hat{\mathbf{u}}_j^+, \tilde{\mathbf{u}}_j, \tilde{\mathbf{u}}_j^+\}_{j=1, j \neq i}^B$ .
- 9:      $\lambda_i \leftarrow 1 - \frac{1}{4} \sum_{\hat{\mathbf{s}} \in \{\hat{\mathbf{u}}_i, \hat{\mathbf{u}}_i^+\}} \sum_{\tilde{\mathbf{s}} \in \{\tilde{\mathbf{u}}_i, \tilde{\mathbf{u}}_i^+\}} \text{sim}(\hat{\mathbf{s}}, \tilde{\mathbf{s}})$ .
- 10:      $\hat{\mathcal{L}}_i \leftarrow -\log \sigma \left[ \lambda_i \left( \text{sim}(\hat{\mathbf{u}}_i, \hat{\mathbf{u}}_i^+) - \max_{\mathbf{v} \in \{\tilde{\mathbf{u}}_i, \tilde{\mathbf{u}}_i^+\}} \text{sim}(\hat{\mathbf{u}}_i, \mathbf{v}) \right) \right.$   
        $\left. + (1 - \lambda_i) \left( \min_{\mathbf{v} \in \{\tilde{\mathbf{u}}_i, \tilde{\mathbf{u}}_i^+\}} \text{sim}(\hat{\mathbf{u}}_i, \mathbf{v}) - \max_{\mathbf{w} \in \mathbf{U}_i^-} \text{sim}(\hat{\mathbf{u}}_i, \mathbf{w}) \right) \right]$ .
- 11:      $\tilde{\mathcal{L}}_i \leftarrow -\log \sigma \left[ \lambda_i \left( \text{sim}(\tilde{\mathbf{u}}_i, \tilde{\mathbf{u}}_i^+) - \max_{\mathbf{v} \in \{\hat{\mathbf{u}}_i, \hat{\mathbf{u}}_i^+\}} \text{sim}(\tilde{\mathbf{u}}_i, \mathbf{v}) \right) \right.$   
        $\left. + (1 - \lambda_i) \left( \min_{\mathbf{v} \in \{\hat{\mathbf{u}}_i, \hat{\mathbf{u}}_i^+\}} \text{sim}(\tilde{\mathbf{u}}_i, \mathbf{v}) - \max_{\mathbf{w} \in \mathbf{U}_i^-} \text{sim}(\tilde{\mathbf{u}}_i, \mathbf{w}) \right) \right]$ .
- 12:   **end for**
- 13:    $\mathcal{L} \leftarrow \sum_{i=1}^B (\hat{\mathcal{L}}_i + \tilde{\mathcal{L}}_i) / 2B$ .
- 14:   Update the parameters of the user model  $\mathcal{M}$  with  $\mathcal{L}$  by backpropagation.
- 15: **end while**

---

## 23 C Implementation Details

24 In our experiments, the embedding dimension  $d$  is set as 64. In the Transformer Encoder, the number  
 25 of attention heads and layers are both set as 2. We only utilize the standard dropout mask, which is  
 26 applied to both the attention probabilities and the output of each sub-layer, and the dropout probability  
 27 is set as 0.1. The maximum sequence length is set to 100 and 256 for the TTL dataset and the App  
 28 dataset, respectively. For each downstream task, a two-layer MLP is added to the pre-trained user  
 29 model, and the dimension of the intermediate layer is also set as 64.

30 For existing pre-training methods, the data augmentation proportion  $\rho$  is either searched from  
 31  $\{0.1, 0.2, \dots, 0.9\}$  or copied from previous works if provided. In our AdaptSSR, we adopt three  
 32 random augmentation operators by default: mask, crop, and reorder. The augmentation proportion is  
 33 set to 0.6, 0.4, and 0.6 respectively while our experimental results have shown that our method is  
 34 robust to various data augmentation methods with different strengths.

35 We use the Adam optimizer for model training. The batch size and learning rate are set as 128 and  
 36  $2e-4$  for both pre-training and fine-tuning. The test results for all the models are reported at their best  
 37 validation epoch. We repeat each experiment five times with different random seeds and report the  
 38 average results. We implement all experiments with Python 3.8.13 and Pytorch 1.12.1 on an NVIDIA  
 39 Tesla V100 GPU. Our code is available at <https://anonymous.4open.science/r/AdaptSSR/>.

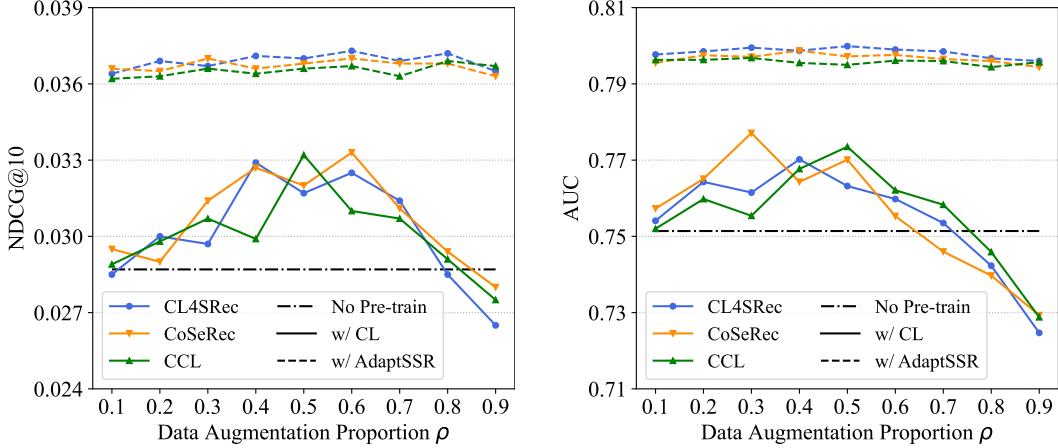

Figure 2: The effectiveness of AdaptSSR when combined with existing pre-training methods on the downstream thumb-up recommendation task (left) and CVR prediction task (right).

## 40 D More Experimental Results

41 Fig. 2 shows the performance of AdaptSSR when combined with several existing pre-training  
 42 methods: CL4SRec, CoSeRec, and CCL, on the downstream thumb-up recommendation task ( $\mathcal{T}_4$ )  
 43 and CVR prediction task ( $\mathcal{T}_6$ ) with the data augmentation proportion  $\rho$  varying from 0.1 to 0.9.  
 44 Similar to the results on the age prediction task ( $\mathcal{T}_1$ ), we find that these contrastive learning-based  
 45 methods are highly sensitive to the data augmentation proportion. A too-small or too-large value  
 46 of  $\rho$  will lead to limited performance gain or even negative transfer for the downstream task. In  
 47 contrast, our AdaptSSR consistently boosts the effectiveness of these pre-training methods by a large  
 48 margin. This is because our self-supervised ranking task avoids directly maximizing the similarity  
 49 between the augmented views. Moreover, our AdaptSSR also substantially improves the robustness  
 50 of these pre-training methods to the augmentation proportion, which verifies the effectiveness of  
 51 our augmentation-adaptive fusion mechanism. The dynamic coefficient  $\lambda_i$  enables the user model  
 52 to automatically combine the learned pairwise ranking orders based on the similarity between the  
 53 augmented views for each training sample, thus empowering the pre-training methods to adapt to  
 54 diverse data augmentation methods with varying strengths.

## 55 E Limitations

56 In this work, after pre-training the user model with our AdaptSSR, the entire model is fine-tuned with  
 57 the downstream labeled data. However, fine-tuning such a large model for each downstream task can  
 58 be time- and space-consuming. A potential solution for this problem is Parameter-Efficient Fine-  
 59 Tuning (PEFT). Several methods such as Adapter and LoRA have been demonstrated to be effective  
 60 for adapting the large language model to various downstream tasks by only updating a small fraction  
 61 of parameters. However, we empirically find that these methods perform poorly when applied to the  
 62 pre-trained user model. A possible reason is that the currently widely used Transformer-based user  
 63 model is much shallower and thinner than the large language model. Most of the model parameters  
 64 belong to the bottom behavior embedding table, while the upper Transformer blocks only contain  
 65 very few parameters. Since existing PEFT methods mainly focus on tuning parts of parameters in  
 66 each Transformer block, only a very small fraction of parameters in total will be updated, which  
 67 may not be enough to effectively adapt the user model to the downstream task. We will investigate  
 68 how to transfer the pre-trained user model to various downstream tasks parameter-efficiently while  
 69 maintaining the performance gain brought by AdaptSSR in our future work.
